# Supplementary material for: Low-Dose Oral Iron Replacement Therapy Is Effective for Many Japanese Hemodialysis Patients: A Retrospective Observational Study
Source: MDPI journal article supplement (doi:10.3390/nu15010125), 2022-12-27
Supplement: s1 [file s1]

Supplementary Materials

# Low-Dose Oral Iron Replacement Therapy Is Effective for Many Japanese Hemodialysis Patients: A Retrospective Observational Study

Chie Ogawa <sup>1,2,\*</sup>, Ken Tsuchiya <sup>2,3</sup>, Mineko Kanemitsu <sup>1</sup> and Kunimi Maeda <sup>1,2</sup>

**Table S1.** One-way repeated measures analysis of variance was performed for changes over time.

|      |   | 3–4 week | 7–8 week | 11–12 week | 15–16 week | 19–20 week | 21–24 week | 27–28 week |
|------|---|----------|----------|------------|------------|------------|------------|------------|
| Hb   | ① | *        | *        | *          | *          | *          | *          | *          |
|      | ② |          |          | **         | *          | *          | *          | *          |
|      | ③ | **       | *        | *          |            |            |            |            |
| RBC  | ① | *        | *        | *          | *          | **         |            |            |
|      | ② |          |          |            | *          |            |            |            |
|      | ③ |          | *        | **         |            |            |            | **         |
| MCH  | ① |          |          | **         | *          | *          | *          | *          |
|      | ② |          |          | **         | *          | *          | *          | *          |
|      | ③ |          | **       | **         | *          | *          | *          | *          |
| s-ft | ① | *        | *        | *          | *          | *          | *          | *          |
|      | ② |          |          |            | **         | *          |            | **         |
|      | ③ | *        | *        | *          | *          | *          | *          | *          |
| TSAT | ① | *        | *        | *          | *          | *          | *          | *          |
|      | ② |          |          |            | **         | **         |            |            |
|      | ③ |          |          |            | *          | **         | *          | **         |

①: group1, ②: group2, ③: group3.

\*,  $p < 0.01$ , \*\*,  $p < 0.05$  (vs. 0 wk).

Hb; Hemoglobin, RBC; Red blood cells, MCH; mean corpuscular hemoglobin, s-ft; serum ferritin, TSAT; Transferrin saturation.
